# Supplementary material for: A novel immuno-device based on the specific binding of AuNP-supported CTAB with biotinylated antibody of hyaluronic acid toward an early-stage recognition of a biomarker: a bioanalytical assay in real samples using disposal biosensor technology
Source: Royal Society of Chemistry journal article supplement (doi:10.1039/d2ra04984h), 2022-01-01
Supplement: d2ra04984h1.pdf [file d2ra04984h1.pdf]

## Supporting information

### **A novel immuno-device based on specific binding of AuNPs supported CTAB with biotinylated antibody of Hyaluronic Acid toward early-stage recognition of biomarker: A bioanalytical assay in real samples using disposal biosensor technology**

Ahmad Mobed <sup>abc1</sup>, Fereshteh Kohansal <sup>c1</sup>, Sanam Dolati <sup>b\*</sup>, Mohammad Hasanzadeh <sup>c\*\*</sup>

<sup>a</sup> Aging Research Institute, Faculty of Medicine, Tabriz University of Medical Sciences, Iran

<sup>b</sup> Physical Medicine and Rehabilitation Research Center, Aging Research Institute, Tabriz University of Medical Sciences, Tabriz, Iran

<sup>c</sup> Pharmaceutical Analysis Research Center, Tabriz University of Medical Sciences, Tabriz, Iran

Corresponding authors

\* Physical Medicine and Rehabilitation Research Center, Aging Research Institute, Tabriz University of Medical Sciences, Tabriz, Iran. [sanam.dolati@gmail.com](mailto:sanam.dolati@gmail.com)

\*\* Pharmaceutical Analysis Research Center, Tabriz University of Medical Sciences, Tabriz 51664, Iran. [hasanzadehm@tbzmed.ac.ir](mailto:hasanzadehm@tbzmed.ac.ir)

<sup>1</sup>Co-first author

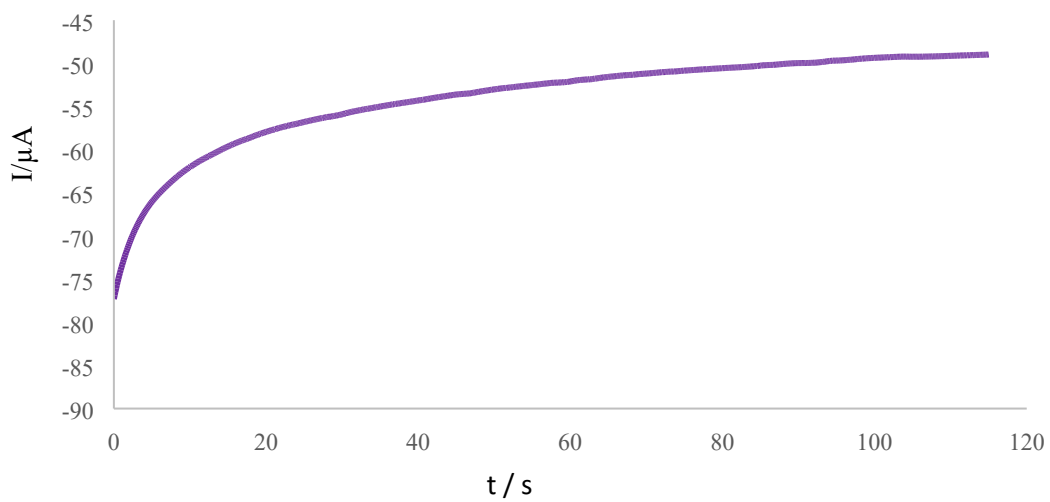

**Fig. S1.** Deposition of Au(CTAB) on ITO-PET by CHA technique, with the data's of:  $T_{\text{equilibration}} = 2 \text{ s}$ ,

$E_{\text{dc}} = -0.23 \text{ V}$ ,  $t_{\text{interval}} = 0.1 \text{ s}$ ,  $t_{\text{run}} = 120 \text{ s}$ .

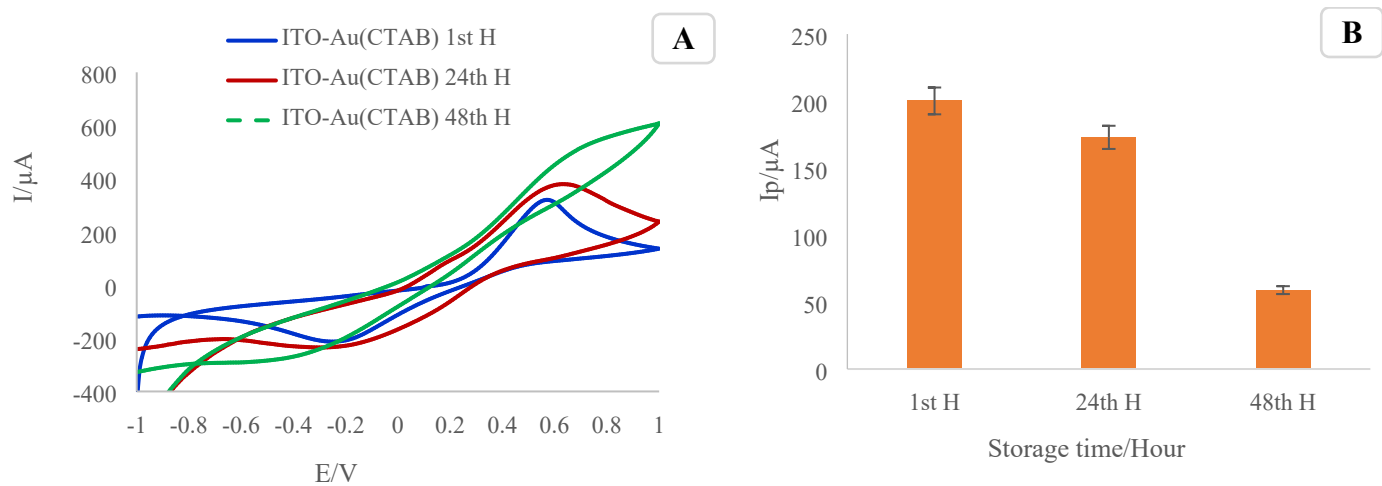

**Fig. S2. A)** CVs of ITO-PET-AuNPs (CTAB) in different times of storage (1st, 24th and 48th hour), in the presence of  $K_4Fe(CN)_6 / K_3Fe(CN)_6$  0.5M containing KCl. **B)** Histogram of peak current in different storage times (per hour).

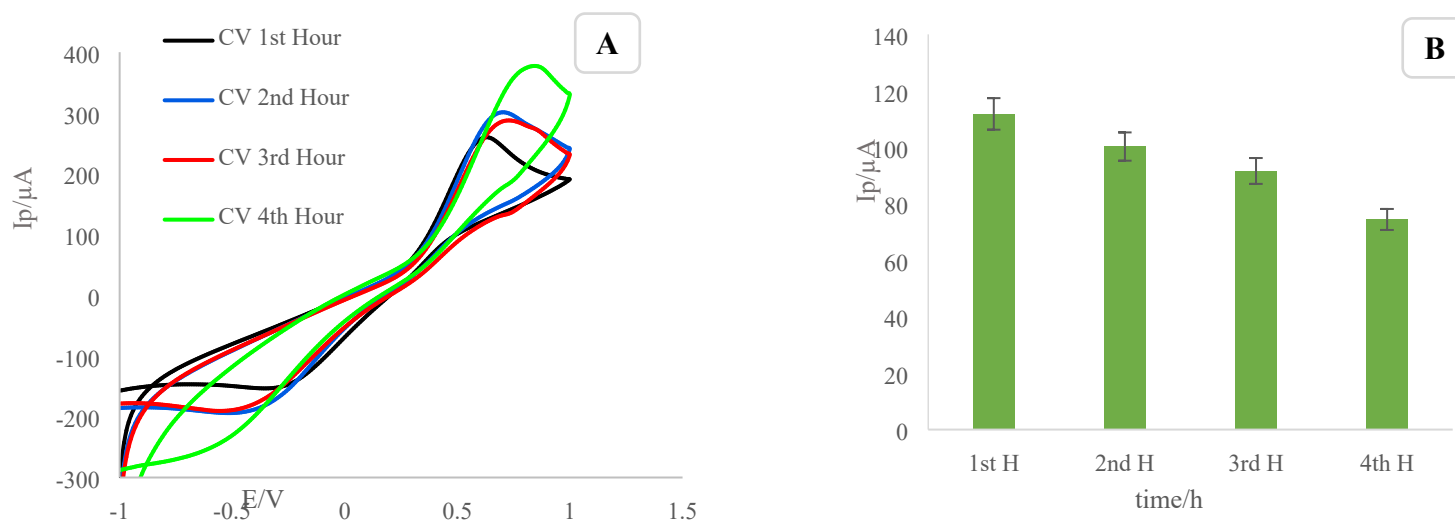

**Fig.S3. A)** CVs of ITO-PET-AuNPs (CTAB) in different times of storage (1st, 2nd, 3rd and 4th hours), in the presence of  $K_4Fe(CN)_6 / K_3Fe(CN)_6$  0.5M containing KCl. **B)** Histogram of peak current in different storage times (per hour).

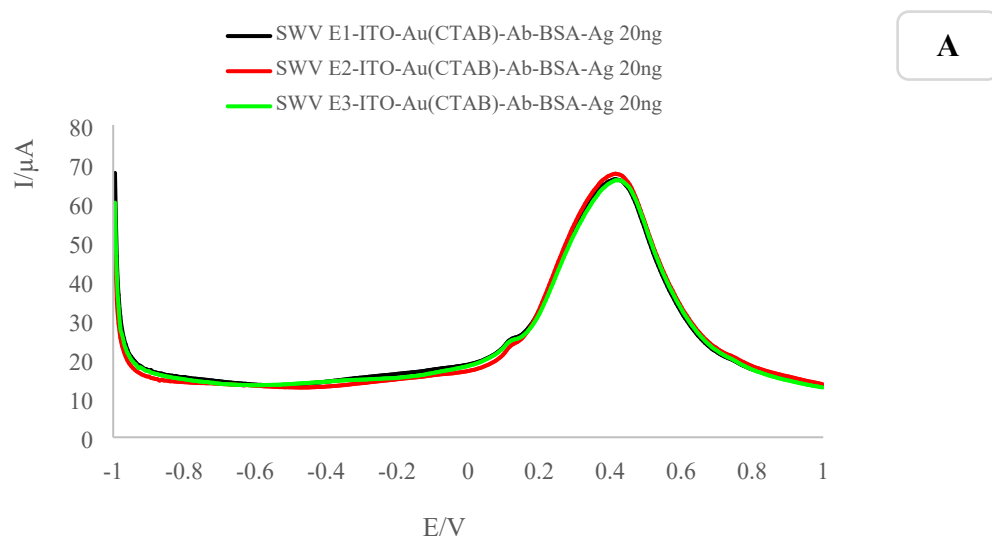

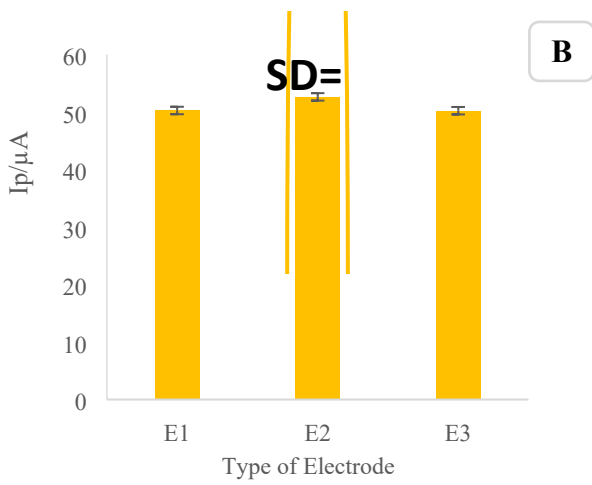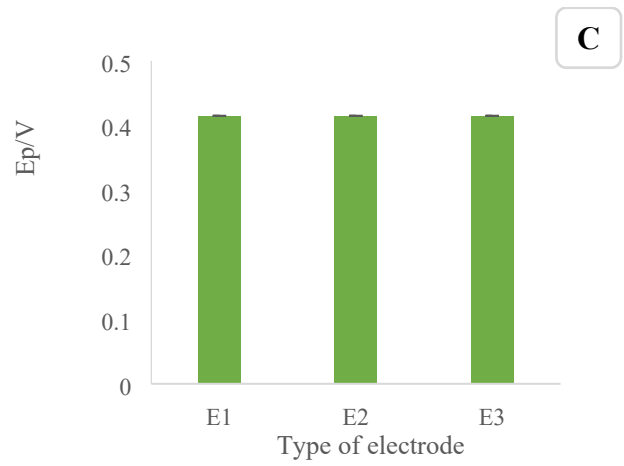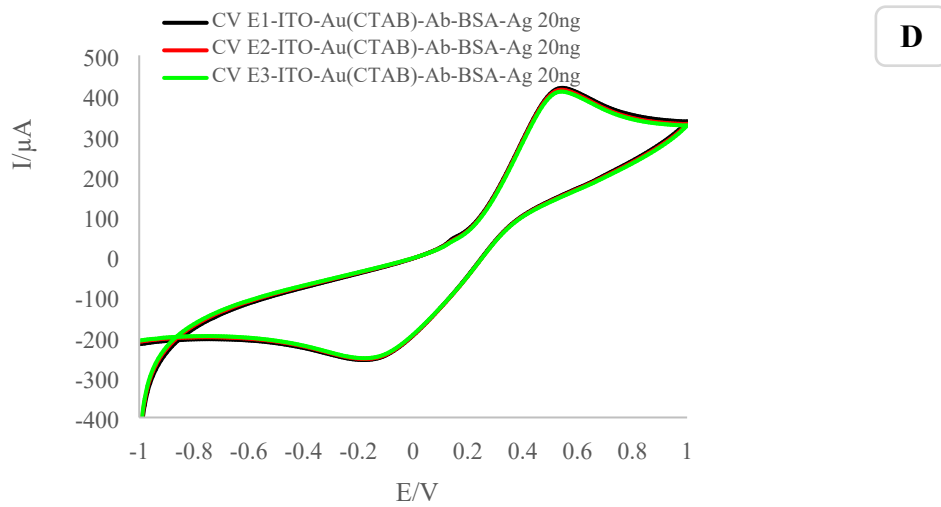

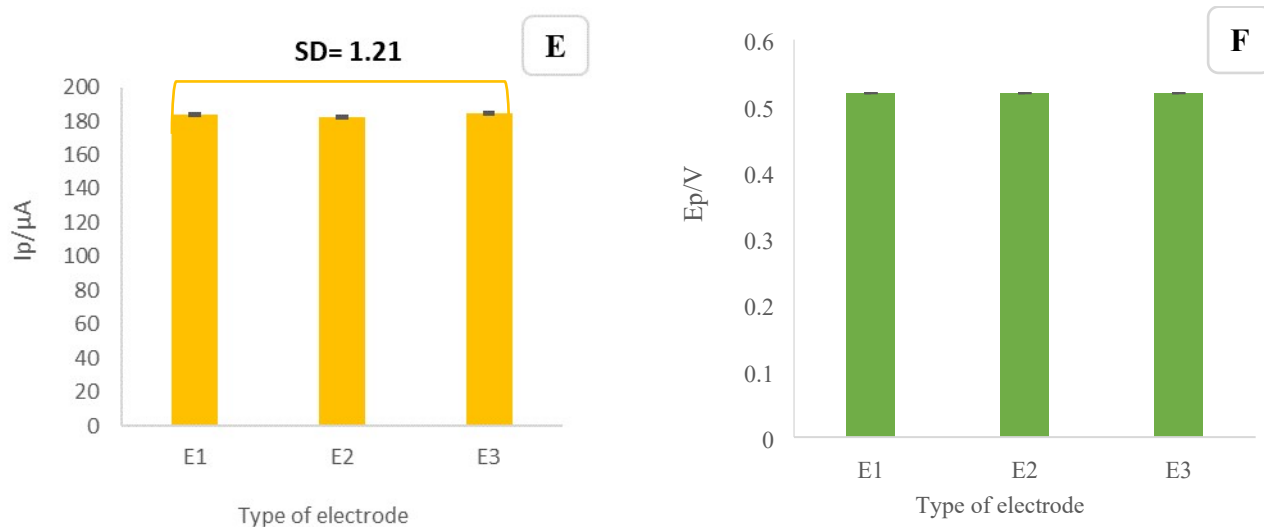

**Fig. S4. A, D)** SWV and CVs of engineered immunosensor reproducibility, in the presence of  $\text{K}_4\text{Fe}(\text{CN})_6 / \text{K}_3\text{Fe}(\text{CN})_6$  0.5M containing KCl (0.1 M). **B, C & E, F)** Histogram of peak current height ( $\mu\text{A}$ ) and potential (V) of SWV and CV, respectively. (**RSD**= 0.0269%, 0.006%, **n**=3, respectively).

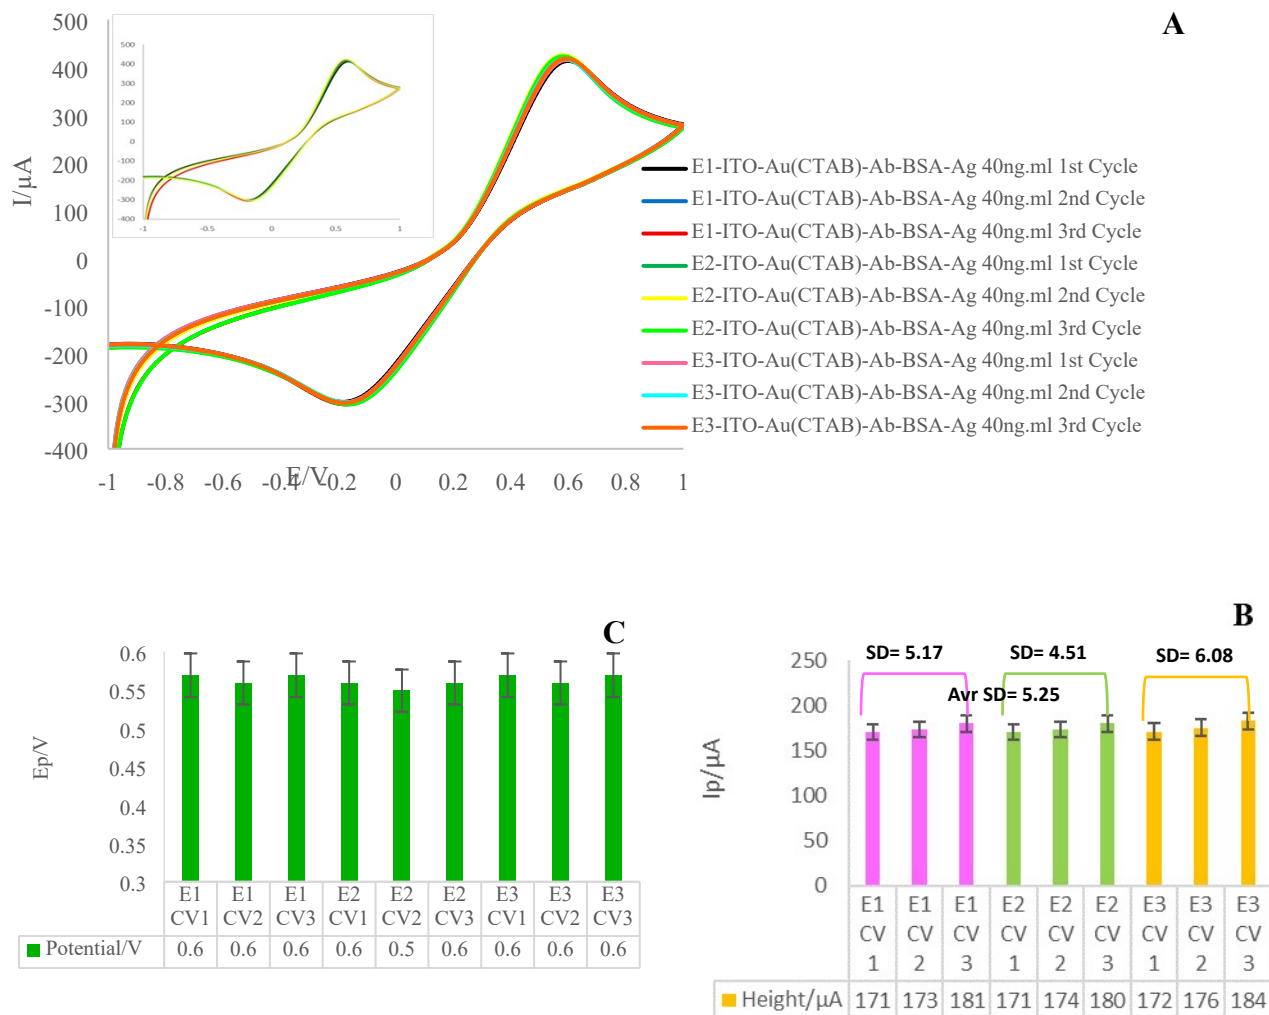

**Fig. S5. A)** CVs of engineered immunosensor repeatability, in the presence of  $\text{K}_4\text{Fe}(\text{CN})_6$  / $\text{K}_3\text{Fe}(\text{CN})_6$  0.5M containing KCl. Data information: ( $T_{\text{equilibration}}$ : 0 s,  $E_{\text{begin}}$ : -1.0 V,  $E_{\text{vertex1}}$ : 1.0 V,  $E_{\text{vertex2}}$ : -1.0 V,  $E_{\text{step}}$ : 0.01 V, scan rate: 0.1 V s<sup>-1</sup>). **B & C)** Histogram of peak current ( $\mu\text{A}$ ) and potential (V) of versus number of electrodes.

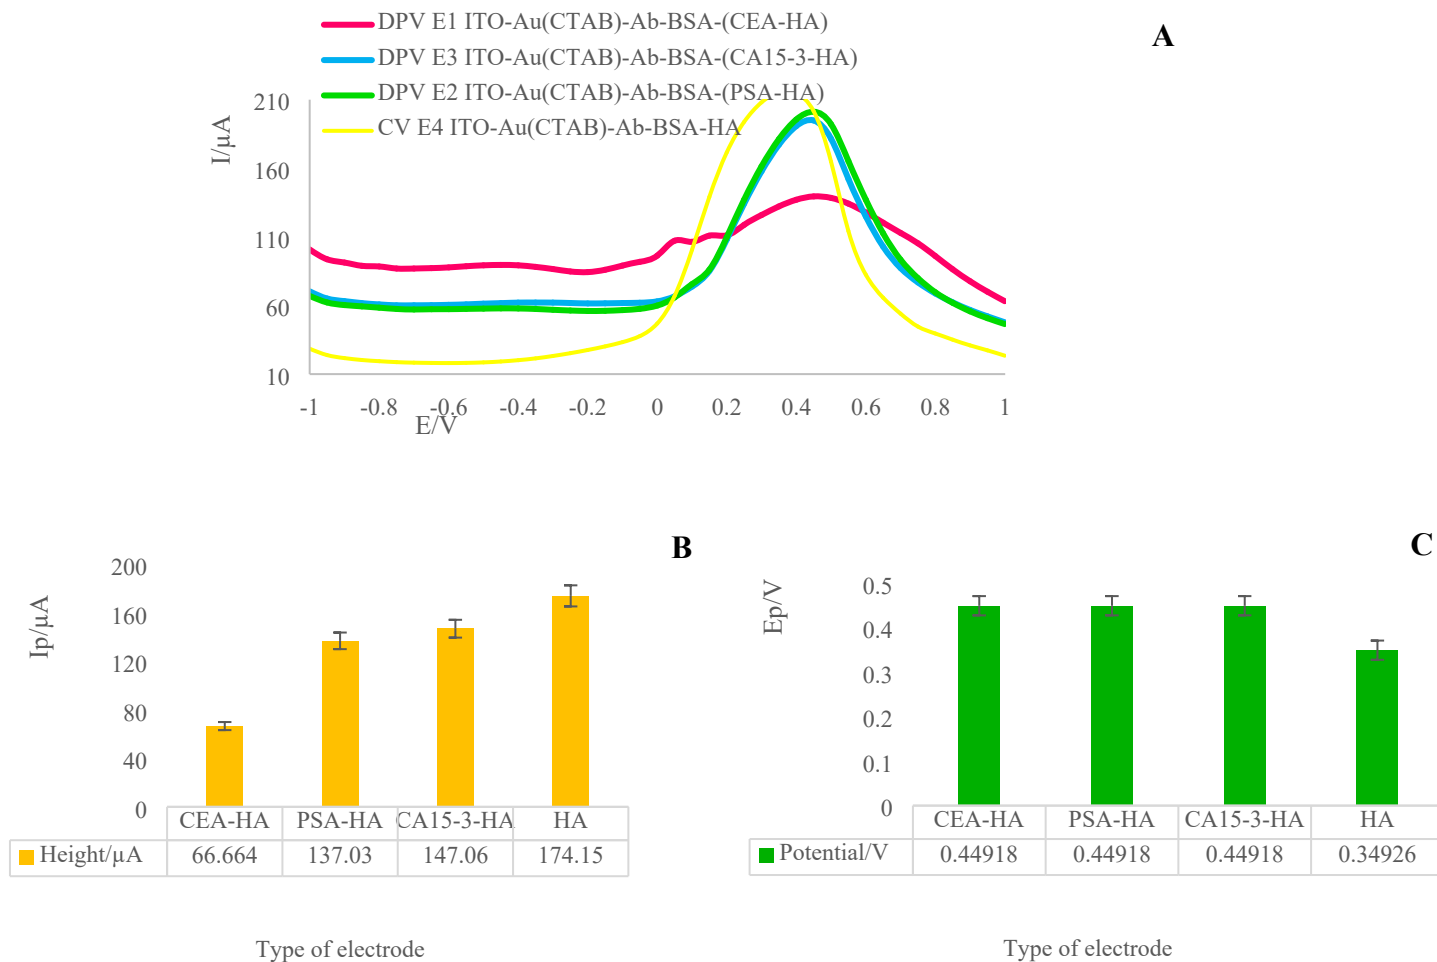

**Fig. S6. A)** DPVs of the fabricated immunosensor in the presence of HA and three interfering biomarkers, PSA ( $60 \text{ ng L}^{-1}$ ), CEA ( $75 \text{ ng L}^{-1}$ ) and CA15-3 ( $70 \text{ ng L}^{-1}$ ). DPV data information: ( $T_{\text{equilibration}}$ : 2 s,  $E_{\text{begin}}$ : -1.0 V,  $E_{\text{end}}$ : 1.0 V,  $E_{\text{step}}$ : 0.1 V,  $E_{\text{pulse}}$ : 0.005 V,  $T_{\text{pulse}}$ : 0.2 s, scan rate:  $0.1 \text{ V s}^{-1}$ ), in the presence of  $\text{K}_4\text{Fe}(\text{CN})_6 / \text{K}_3\text{Fe}(\text{CN})_6$  0.5M containing KCl . **B & C)** Histogram of peak current and related potential (V) versus type of interfering agents.



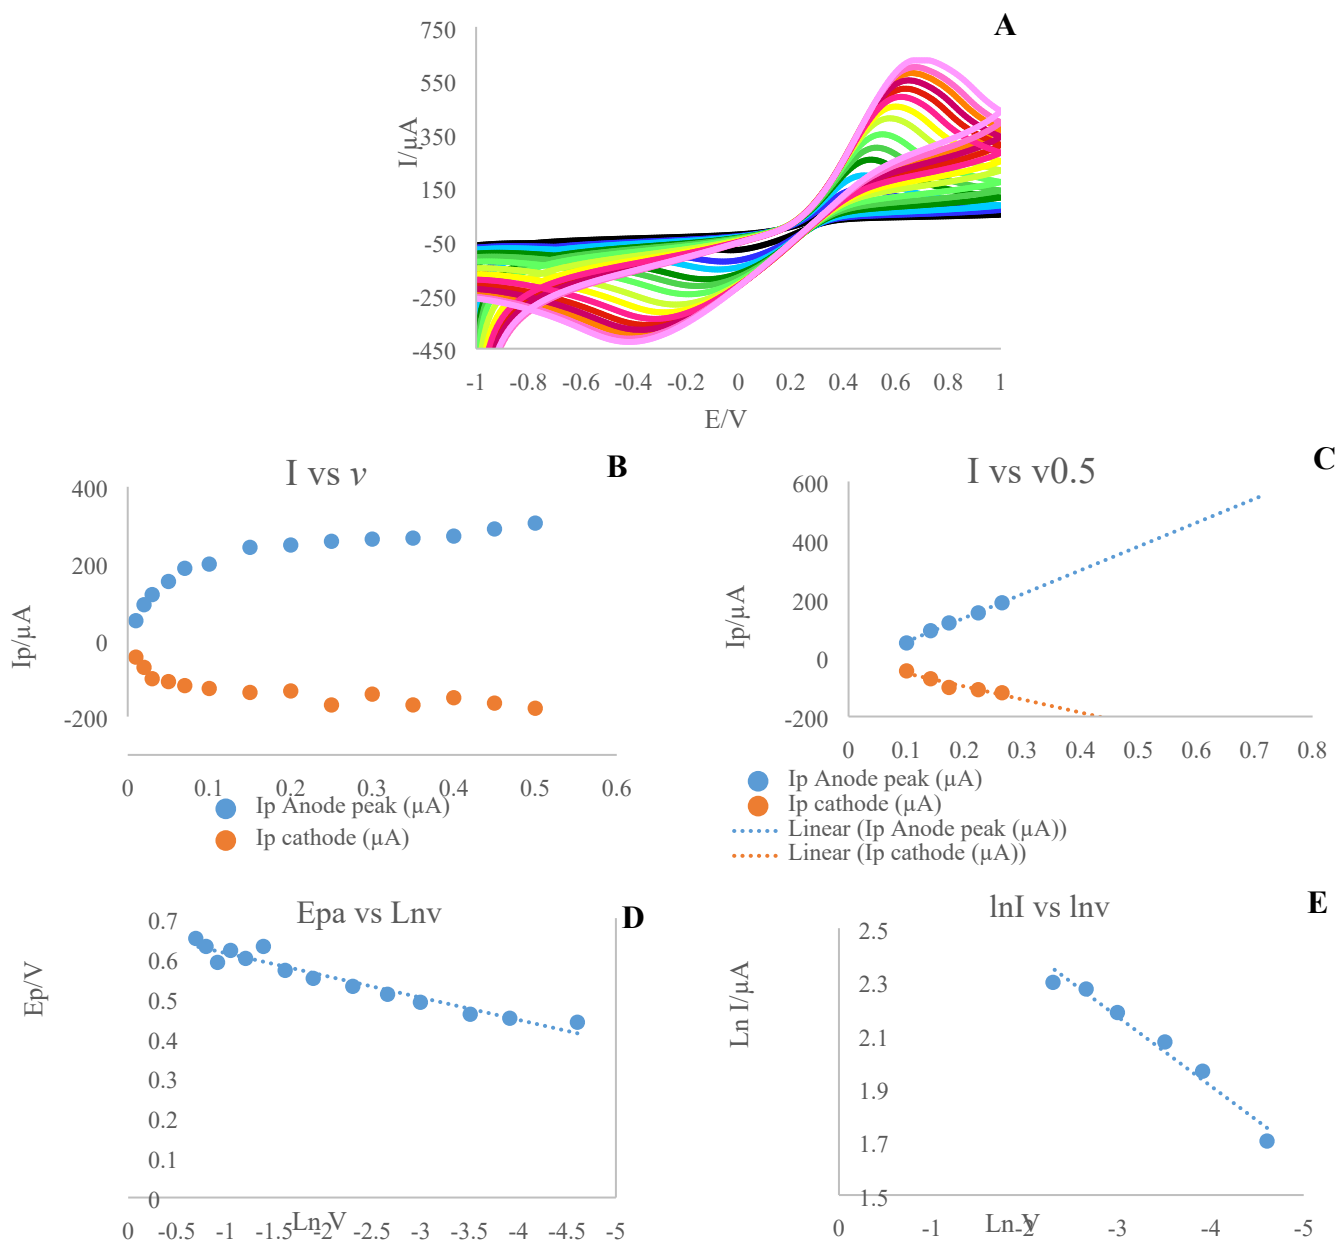

**Fig. S7. A)** CVs of AuNPs-CTAB in 0.01 M  $(\text{Fe}(\text{CN})_6)^{3/4}-\text{KCl}$  in different potential sweep rates (from inner to outer): 10, 20, 30, 40, 50, 60, 70, 80, 90, 100, 200, 300, 400, 500, 600, 700, 800, 900, and 1000  $\text{mV s}^{-1}$ . **B)** Plot of  $E_p$  versus  $\log v$  for cyclic voltammograms depicted in (A) for

anodic peaks (b1) and cathodic peaks (b2). **C-F** The dependency of anodic (**C, E**) and cathodic (**D, F**) peak currents on the potential sweep rate at lower values of 2-75 mV s<sup>-1</sup> (**C, E**) and on the square roots of sweep rate at higher values of 100-900 mV s<sup>-1</sup> (**D, F**).
